# Supplementary material
Source: MDPI journal article supplement (https://www.mdpi.com/2073-4395/9/7/388)
Supplement: s1 [file s1]

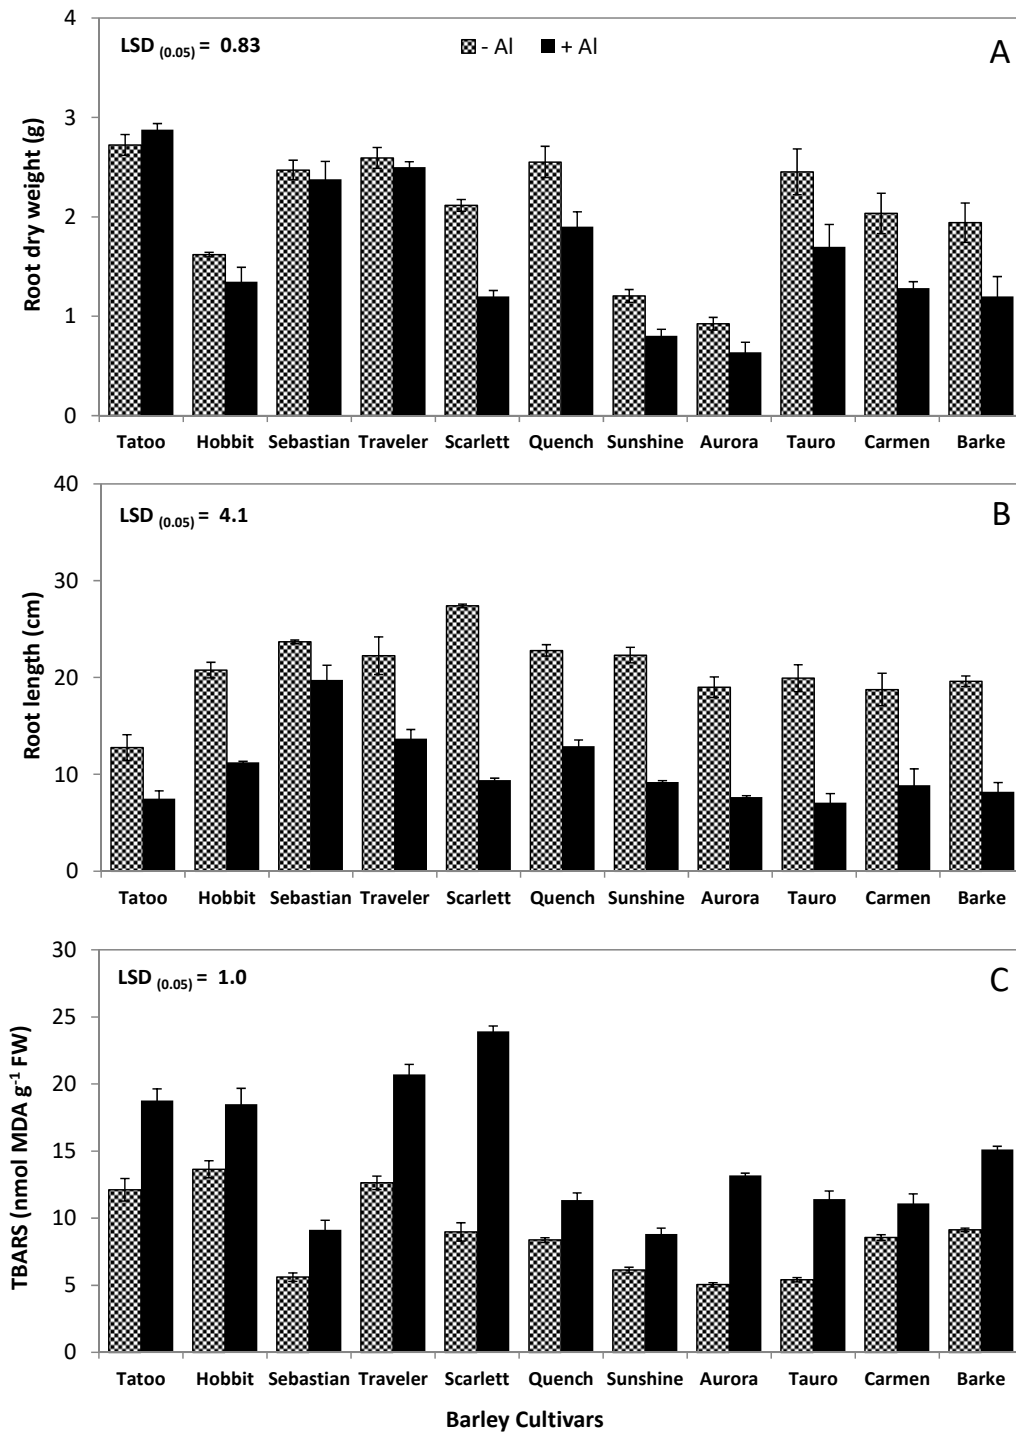

**Figure S1.** Dry weight (A), length (B) and lipid peroxidation (C) in roots of different barley cultivars hydroponically grown without (-Al) or with (+Al) supply of 0.2 mM Al during 21 days. Values correspond to the average of three replicates  $\pm$  standard deviation. Differences between treatments were examined using the LSD test ( $p \leq 0.05$ ).
